# Supplementary material
Source: Royal Society of Chemistry journal article supplement (doi:10.1039/d5ta10289h)
Supplement: d5ta10289h1.pdf [file d5ta10289h1.pdf]

## Supporting Information

### **Engineering hydrolytic stability and reversible O3/P3/OP2 transitions in O3-type sodium-ion battery cathodes through Cu<sup>2+</sup> doping**

Sang Hyuk Gong<sup>a</sup>, Hyeongwoo Kim<sup>a</sup>, Min Kyung Cho<sup>b</sup>, Hyojun Lim<sup>a</sup>, Hyun Beom Kang<sup>a, c</sup>, Jae-Ho Park<sup>a</sup>, Sung-Chul Kim<sup>b</sup>, Elang Barruna<sup>a, d</sup>, Kyung Yoon Chung<sup>a, d</sup>, Wonyoung Chang<sup>a, d</sup>, Wonchang Choi<sup>e, \*</sup>, and Hyung-Seok Kim<sup>a, d, f, \*</sup>

<sup>a</sup>Energy Storage Research Center, Korea Institute of Science and Technology, Seoul 02792, Republic of Korea

<sup>b</sup>Advanced Analysis Center, Korea Institute of Science and Technology, Seoul 02792, Republic of Korea

<sup>c</sup>Department of Materials Science and Engineering, Korea University, Seoul 02841, Republic of Korea

<sup>d</sup>Division of Energy & Environment Technology, KIST School, Korea University of Science and Technology, Seoul 02792, Republic of Korea

<sup>e</sup>Department of Energy Engineering, Konkuk University, Seoul 05029, Republic of Korea

<sup>f</sup>Yonsei-KIST Convergence Research Institute, Yonsei University, Seoul 03722, Republic of Korea

\*Correspondence should be addressed to Dr. Wonchang Choi ([wchoi@konkuk.ac.kr](mailto:wchoi@konkuk.ac.kr)), and Dr. Hyung-Seok Kim ([hskim0227@kist.re.kr](mailto:hskim0227@kist.re.kr))

**Table S1.** Result of Rietveld refinement.

| Sample   | Space group | Lattice parameters<br>(Å) |                | Na occupancy<br>in lattice | Rwp  | Rp   | GOF  |
|----------|-------------|---------------------------|----------------|----------------------------|------|------|------|
|          |             | a                         | c              |                            |      |      |      |
| NFM325   | R-3mH       | 2.94284<br>(3)            | 16.2454<br>(4) | 0.791 (3)                  | 1.56 | 1.09 | 1.82 |
| NFCM3214 | R-3mH       | 2.97503<br>(4)            | 15.9885<br>(4) | 0.930 (5)                  | 1.98 | 1.27 | 2.36 |

**Table S2.** ICP results of pristine powder.

| Sample          | Na   | Ni  | Fe  | Cu  | Mn  |
|-----------------|------|-----|-----|-----|-----|
| <b>NFM325</b>   | 0.99 | 0.3 | 0.2 | 0   | 0.5 |
| <b>NFCM3214</b> | 1.0  | 0.3 | 0.2 | 0.1 | 0.4 |

Comment [u]: ??

**Table S3.** ICP results of water-immersed powder.

| Sample          | Na   | Ni  | Fe  | Cu  | Mn  |
|-----------------|------|-----|-----|-----|-----|
| <b>NFM325</b>   | 0.25 | 0.3 | 0.2 | 0   | 0.5 |
| <b>NFCM3214</b> | 0.61 | 0.3 | 0.2 | 0.1 | 0.4 |

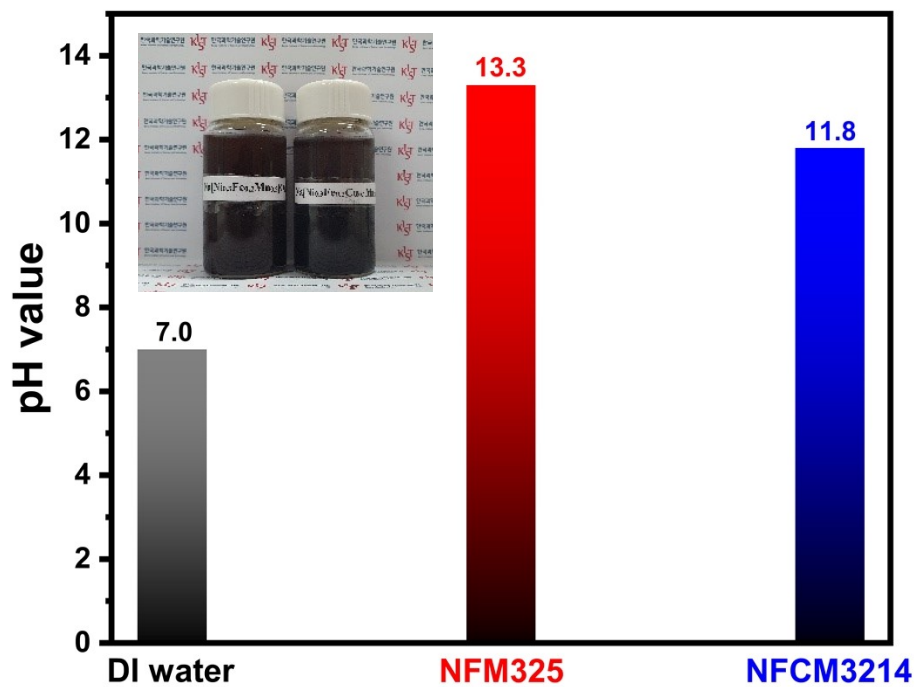

**Figure S1.** pH values and dissolved Na concentration in DI water of NFM325 and NFCM3214 samples after water soaking for 10 min.

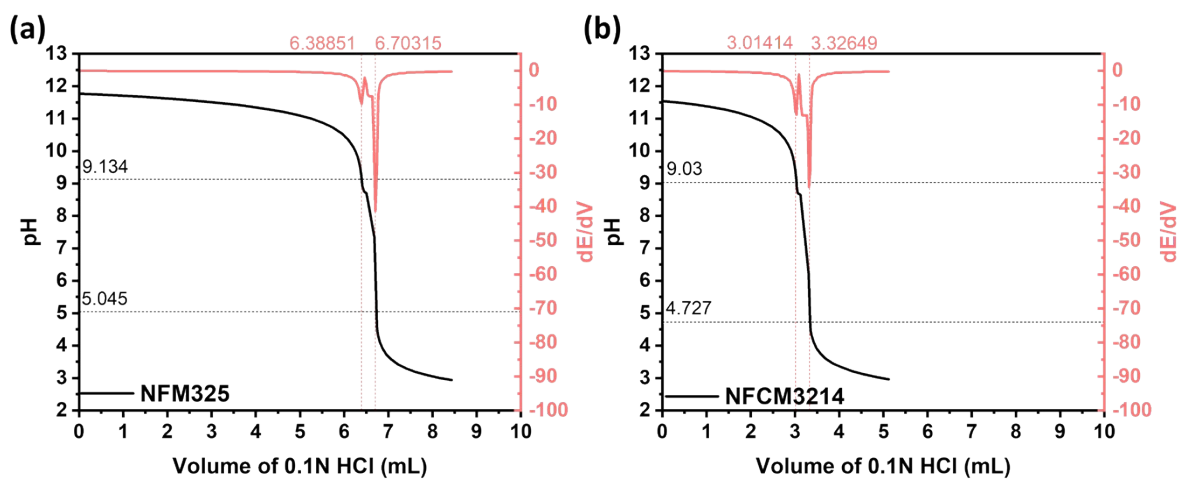

**Figure S2.** Titration curves and corresponding dE/dV profiles of (a) NFM325 and (b) NFCM3214. The first and second equivalence points represent NaOH and Na<sub>2</sub>CO<sub>3</sub>, respectively.

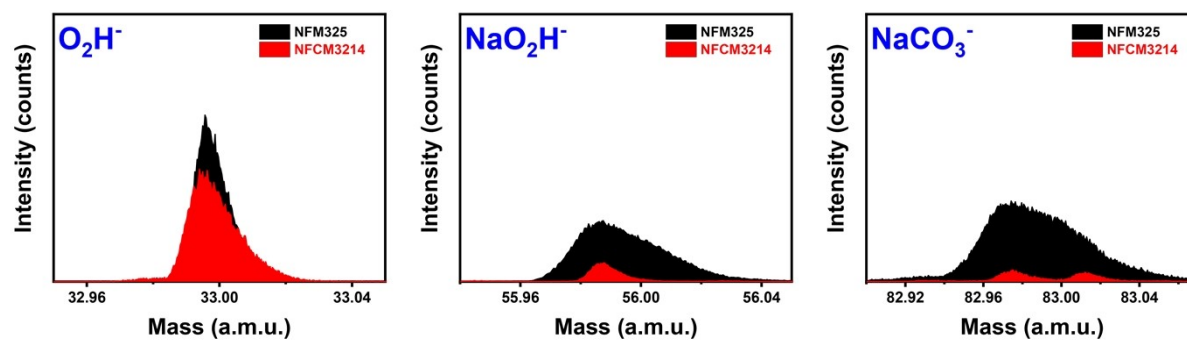

**Figure S3.** TOF-SIMS spectra of water-soaked NFM325 and NFCM3214 samples.

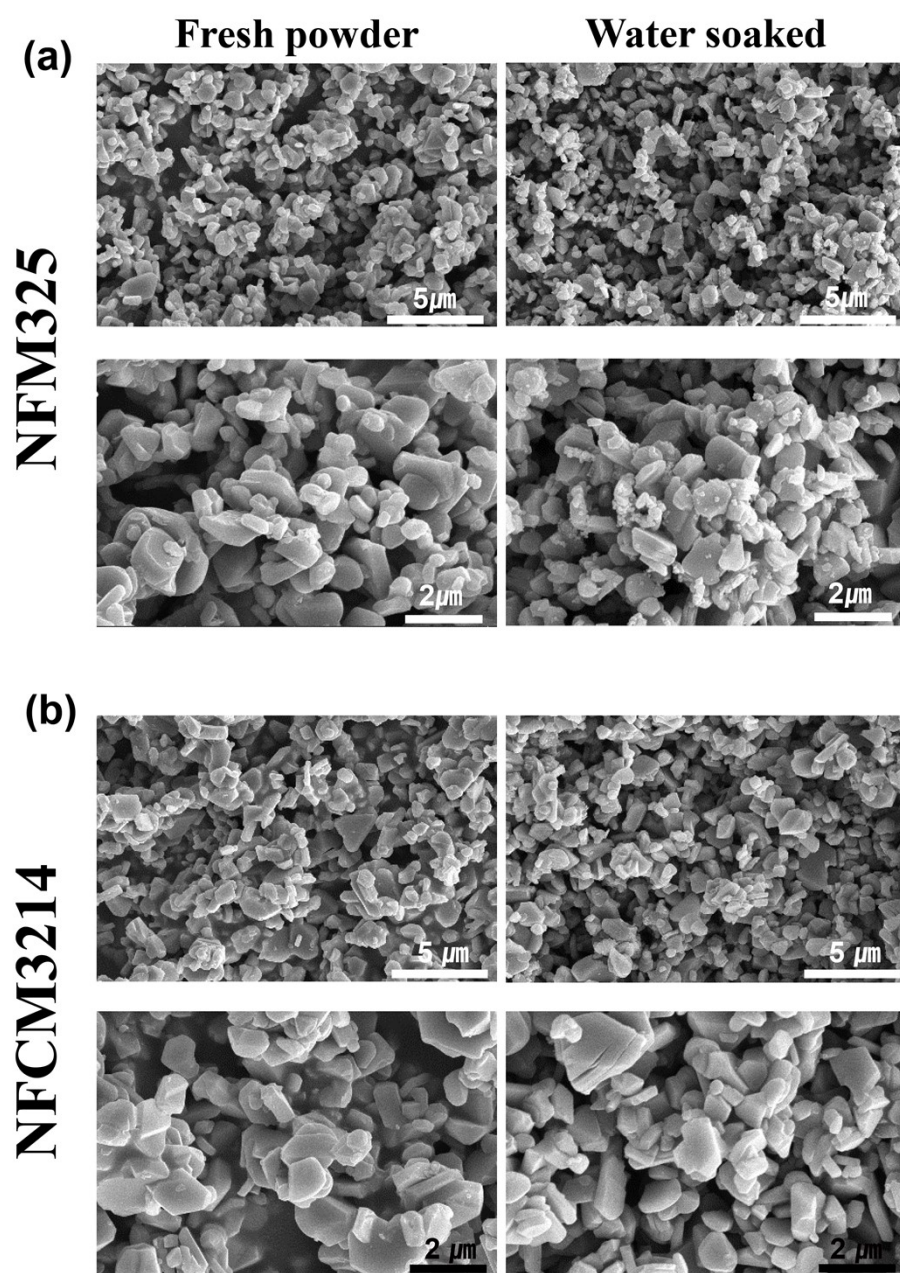

Figure S4. FE-SEM images of water-soaked and air-exposed (a) NFM325 and (b) NFCM3214 samples.

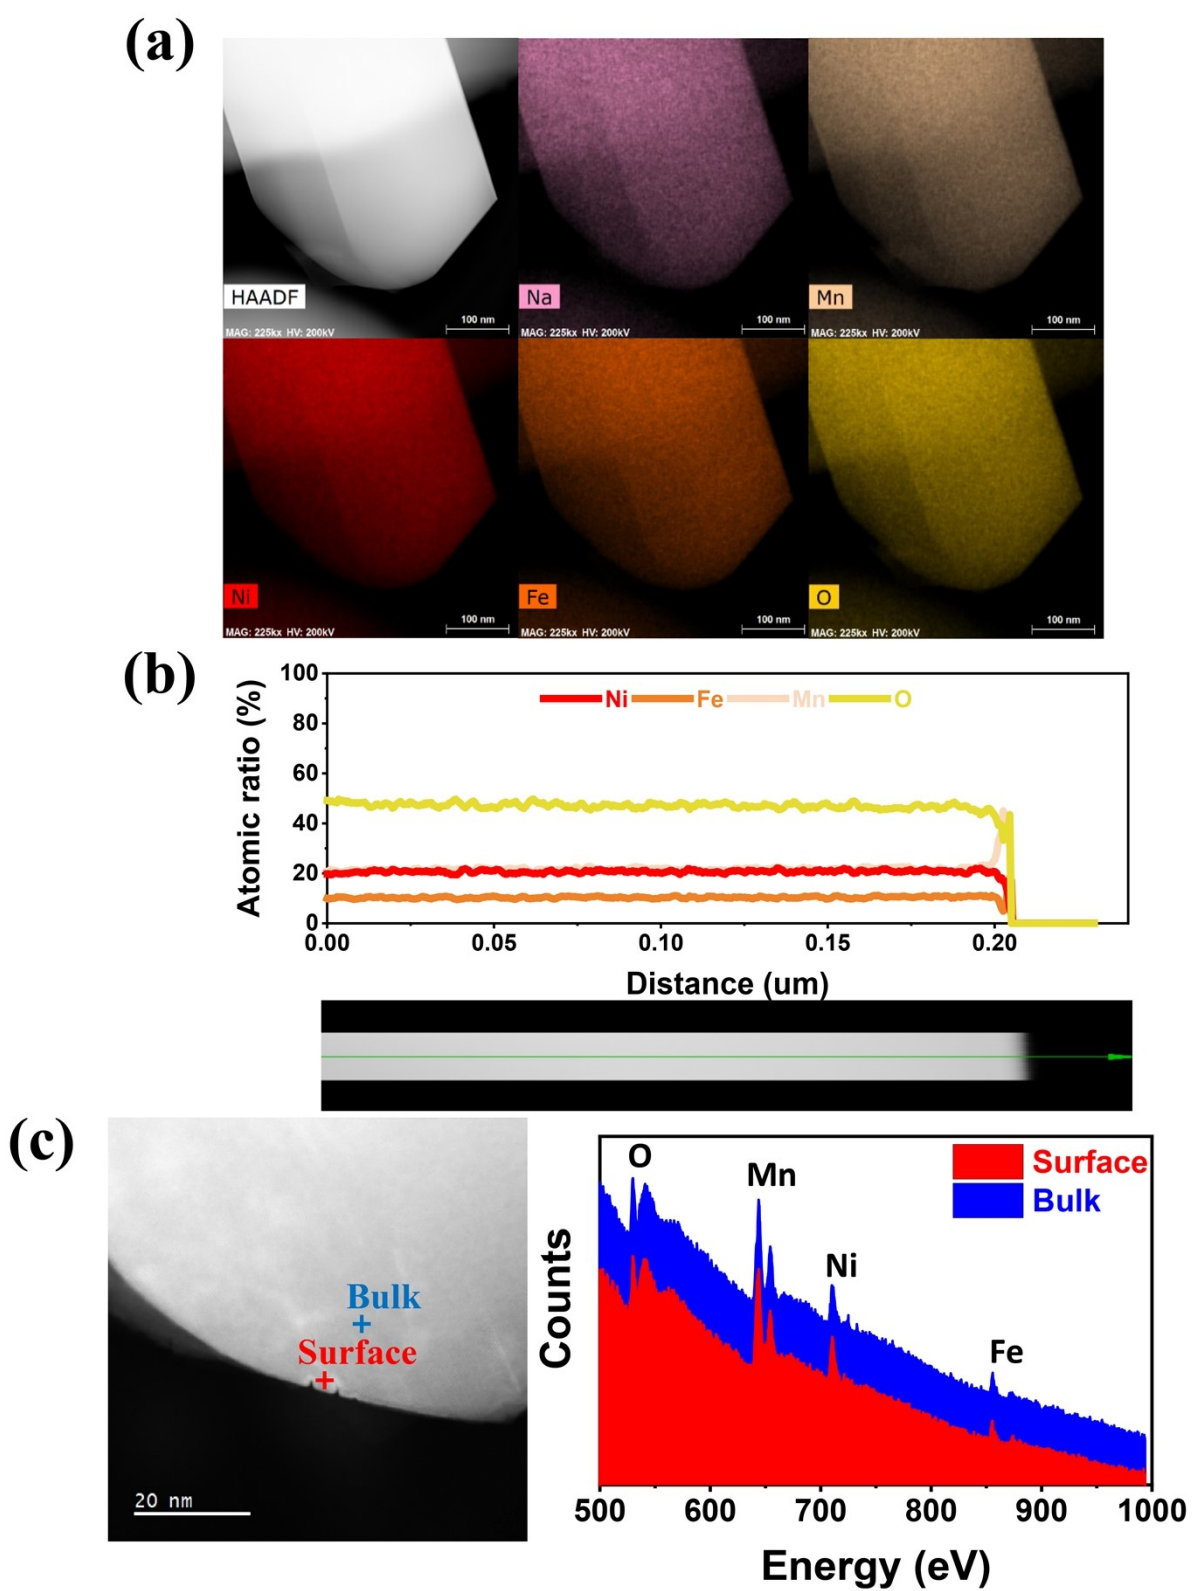

**Figure S5.** (a) EDS mapping, (b) line scanning, (c) STEM images, and EELS spectra of the fresh NFM325 sample.

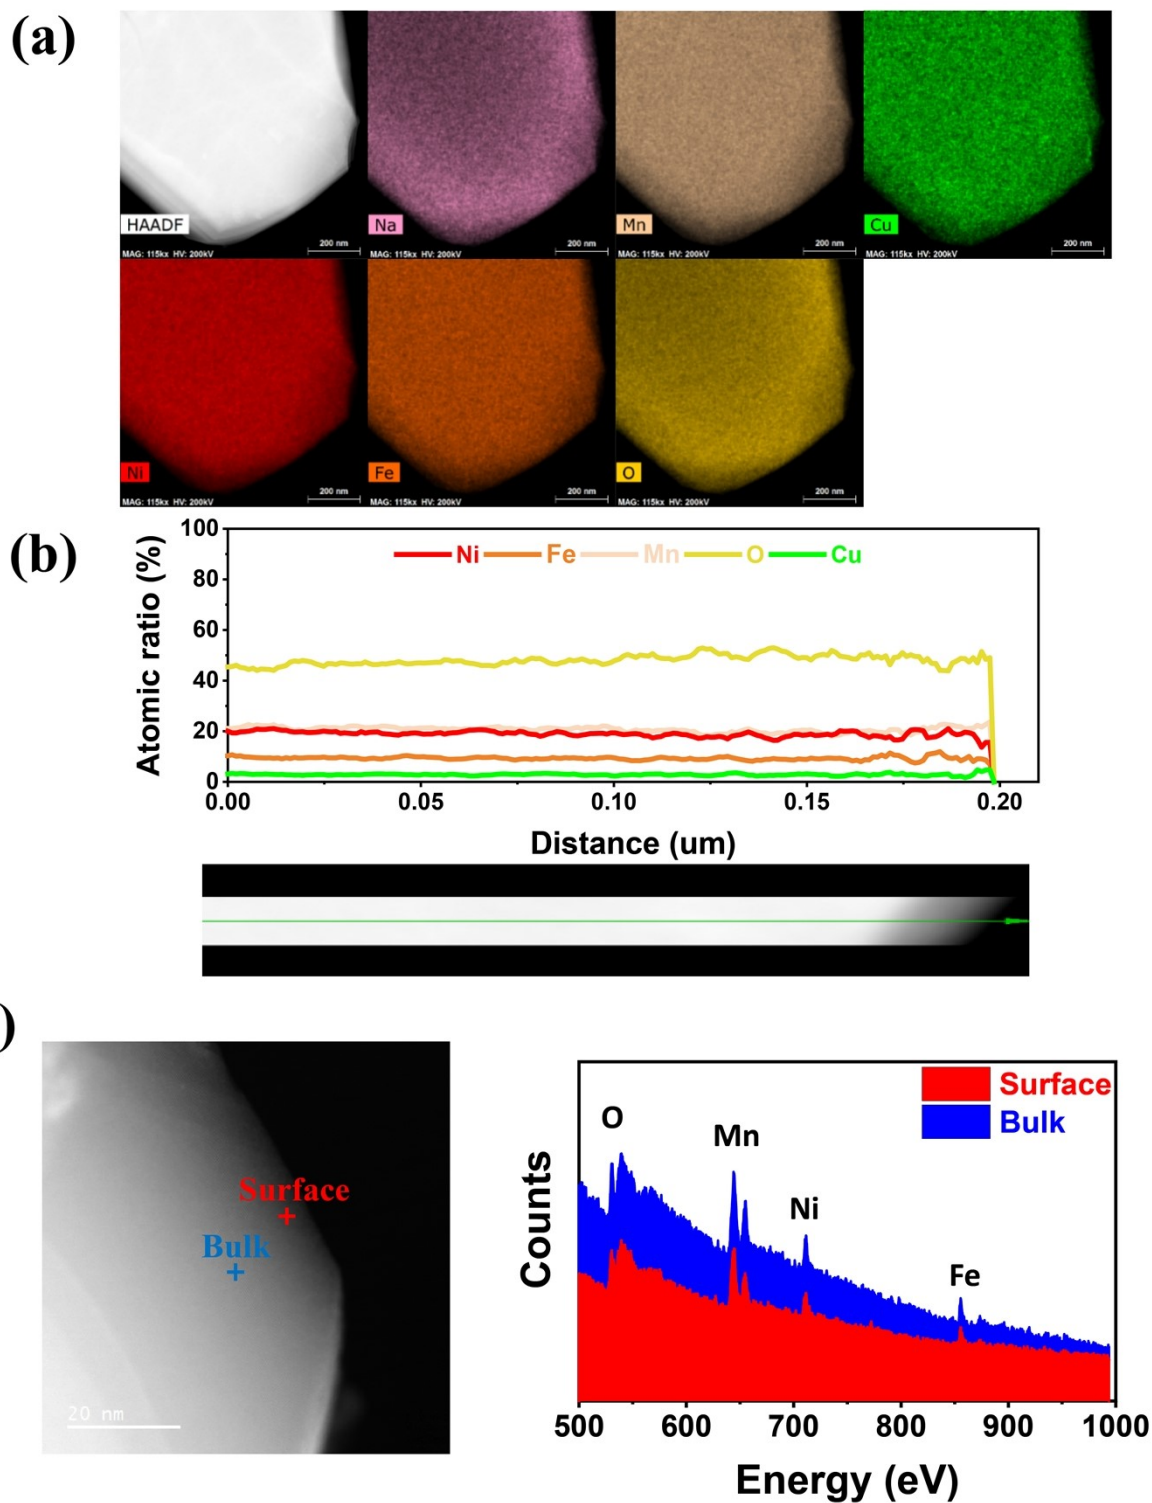

**Figure S6.** (a) EDS mapping, (b) line scanning, (c) STEM images, and EELS spectra of the fresh NFCM3214 sample.

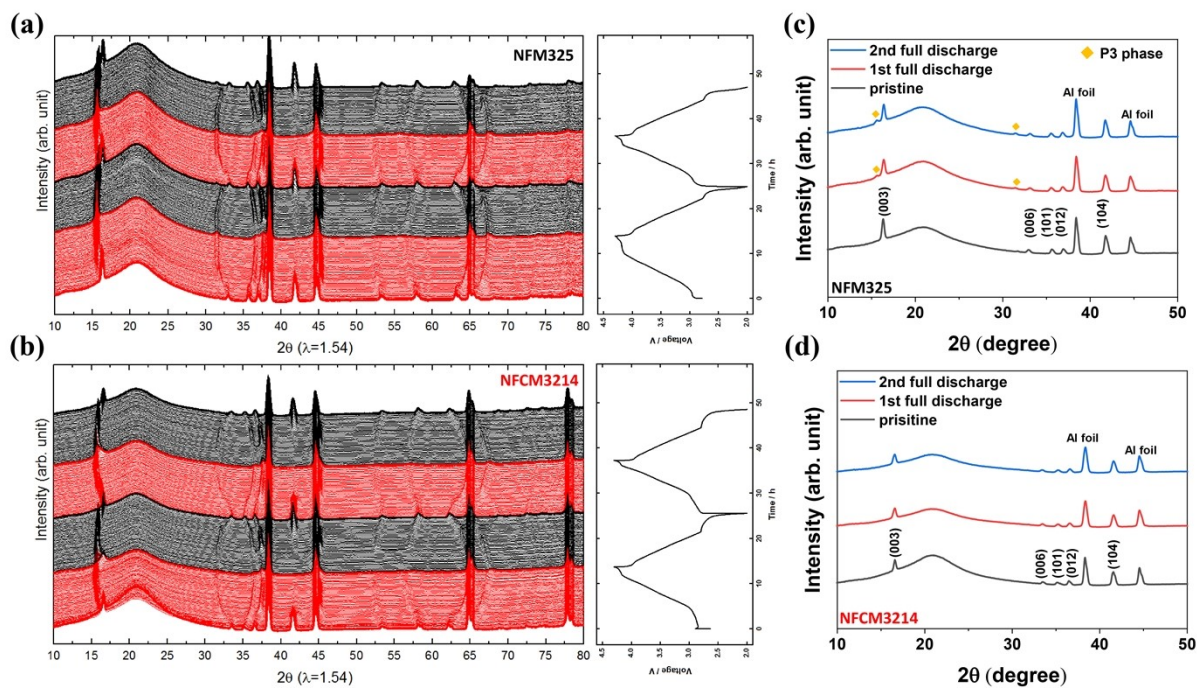

**Figure S7.** *In situ* XRD patterns of (a) NFM325 and (b) NFCM3214 for 2 cycles. *In situ* XRD patterns of (c) NFM325 and (d) NFCM3214 before cycle, after the first full discharge, and after the second full discharge.

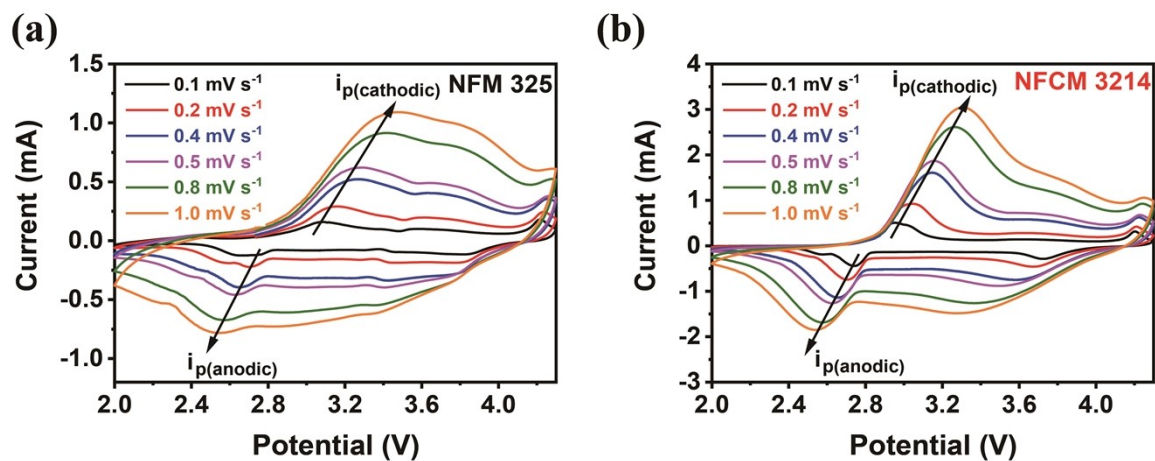

**Figure S8.** Kinetic analyses of the electrochemical behavior towards Na<sup>+</sup> of CV profiles at various scan rates (0.1, 0.2, 0.4, 0.5, 0.8, 1.0 mV s<sup>-1</sup>) after formation cycles at 0.1 mV s<sup>-1</sup> (a) NFM325 and (b) NFCM3214.

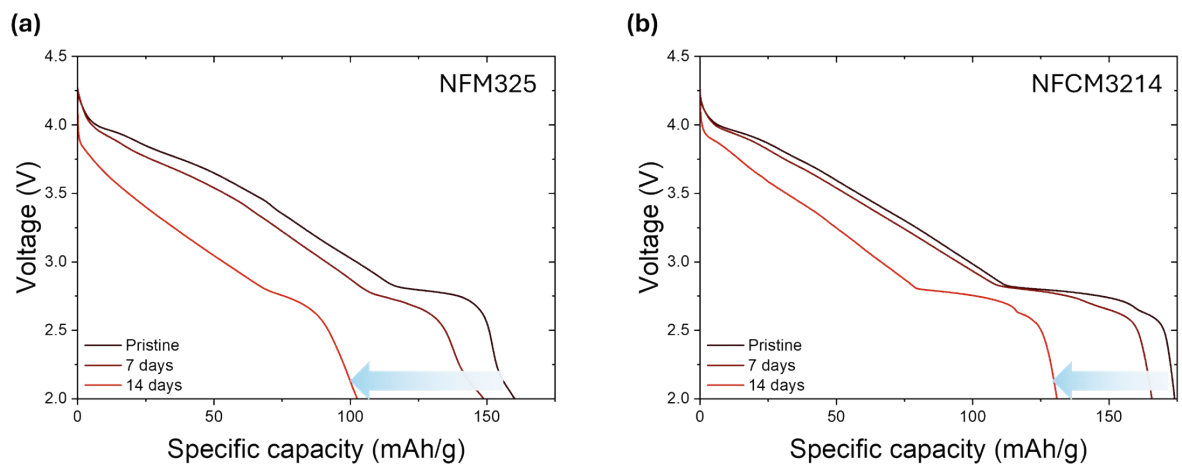

**Figure S9.** Discharge voltage profiles of (a) NFM325 and (b) NFCM3214 after storage at 70 °C and 80% relative humidity for 7 and 14 days.

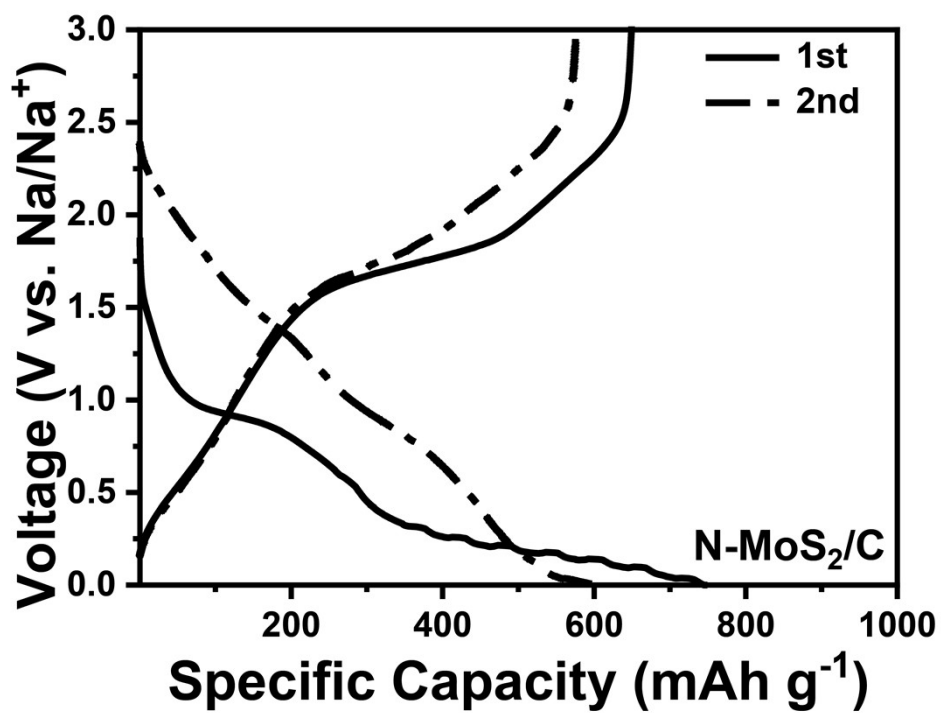

**Figure S10.** Charge/discharge voltage profiles of MoS<sub>2</sub>/C at 1<sup>st</sup> and 2<sup>nd</sup> cycle between 3.0 and 0.001 V versus Na/Na<sup>+</sup> 0.1 C-rate.
